# Supplementary material
Source: publisher figshare collection journal article supplement (https://karger.figshare.com/ndownloader/files/12454271)
Supplement: Supplementary file 1 [file 12454271]

## Sheet: Sheet1
Supplementary Table 1. Quantitative proteomics data from cerebrospinal fluid (CSF) samples.
Database searches of mass spectrometry data searched against pig (Sus scrofa) proteome yielded the Uniprot accession and descriptions "Fasta header".
BLAST searches yielded "Human homolog" and corresponding Uniprot ID and Gene names.
P-values are from student's T-test (pairwise) of the data from; after vs before hypoxia treatment (n=6).
q-values: To correct for multiple testing q-values were calculated through Benjami-Hochberg (BH) adjustment of p-values according to Diz et al 2011 (PMID: 21364085 ).
Fold change: quantitative change of the protein level calculated as the average of ; "after hypoxia divided by before hypoxia".
Comments: DAP are the Differentially Altered Proteins (DAP) with fold change >1.5 and p-value<0.02 (also shown in Table 2). NB the BH adjusted values of these DAPs
are between 0.1 and 0.36.
Fasta headers	Human homolog	Uniprot ID	Gene name	p-value	q-value	Fold change	Comments
>tr|C3S7K5|C3S7K5_PIG Calcium-binding protein A8 OS=Sus scrofa GN=S100A8 PE=4 SV=1;>tr|K7GQW2|K7GQW2_PIG Uncharacterized protein OS=Sus scrofa GN=S100A8 PE=4 SV=1	Protein S100-A8	P05109	S100A8	0.000308124	0.105686	9.4508	DAP
>tr|F2Q9A3|F2Q9A3_PIG Peptidyl-prolyl cis-trans isomerase OS=Sus scrofa GN=ppia PE=2 SV=1;>tr|Q9GK25|Q9GK25_PIG Peptidyl-prolyl cis-trans isomerase (Fragment) OS=Sus scrofa PE=2 SV=1;>tr|I3LE53|I3LE53_PIG Uncharacterized protein (Fragment) OS=Sus scrofa GN	Peptidyl-prolyl cis-trans isomerase A	P62937	PPIA	0.000599255	0.102772	3.76829	DAP
>tr|I3LF89|I3LF89_PIG Uncharacterized protein (Fragment) OS=Sus scrofa GN=CPN2 PE=4 SV=1	Carboxypeptidase N subunit 2	P22792	CPN2	0.00224803	0.257025	1.77939	DAP
>tr|C6EVT4|C6EVT4_PIG E-cadherin OS=Sus scrofa PE=2 SV=1	Cadherin-1	P12830	CDH1	0.00250102	0.214463	0.435623	DAP
>tr|F1RN71|F1RN71_PIG Uncharacterized protein OS=Sus scrofa GN=LOC100521221 PE=4 SV=2	Bleomycin hydrolase	Q13867	BLMH	0.0026993	0.185172	1.6818	DAP
>tr|F1SCV9|F1SCV9_PIG Uncharacterized protein OS=Sus scrofa PE=4 SV=2	Apolipoprotein B-100	P04114	APOB	0.00276365	0.157988	2.25423	DAP
>tr|I3LQ17|I3LQ17_PIG Uncharacterized protein OS=Sus scrofa PE=4 SV=1	Alpha-2-macroglobulin	P01023	A2M	0.00340505	0.166847	2.07542	DAP
>tr|F1SCC6|F1SCC6_PIG Uncharacterized protein OS=Sus scrofa GN=LOC100153899 PE=4 SV=2	Alpha-1-antichymotrypsin	P01011	SERPINA3	0.0042106	0.180529	1.74806	DAP
>tr|F1SCC7|F1SCC7_PIG Uncharacterized protein OS=Sus scrofa GN=LOC100156325 PE=3 SV=1	Alpha-1-antichymotrypsin	P01011	SERPINA3	0.00450241	0.171592	1.53315	DAP
>tr|I3LAB6|I3LAB6_PIG Proteasome subunit alpha type OS=Sus scrofa GN=PSMA2 PE=2 SV=1	Proteasome subunit alpha type-2	P25787	PSMA2	0.00902182	0.309449	4.36873	DAP
>tr|F1RW75|F1RW75_PIG Uncharacterized protein OS=Sus scrofa GN=DSP PE=4 SV=2	Desmoplakin	P15924	DSP	0.00909776	0.283685	0.335259	DAP
>tr|K7ZRK0|K7ZRK0_PIG IgA heavy chian constant region (Fragment) OS=Sus scrofa GN=IGHA PE=4 SV=1;>tr|I3LFH1|I3LFH1_PIG Uncharacterized protein (Fragment) OS=Sus scrofa PE=4 SV=1	Ig alpha-2 chain C region	P01877	IGHA2	0.0133329	0.381098	1.5421	DAP
>tr|F1SJB5|F1SJB5_PIG Annexin OS=Sus scrofa GN=ANXA1 PE=2 SV=2;>tr|K7GLE1|K7GLE1_PIG Annexin OS=Sus scrofa GN=ANXA1 PE=2 SV=1	Annexin A1	P04083	ANXA1	0.0144112	0.380235	2.2985	DAP
>tr|F2Z5N0|F2Z5N0_PIG Proteasome subunit alpha type OS=Sus scrofa GN=PSMA6 PE=3 SV=1;>tr|B6VAQ2|B6VAQ2_PIG Proteasome subunit alpha type 6 OS=Sus scrofa GN=PSMA6 PE=2 SV=1	Proteasome subunit alpha type-6	P60900	PSMA6	0.0148436	0.363668	3.26009	DAP
>tr|F1SAM3|F1SAM3_PIG Uncharacterized protein (Fragment) OS=Sus scrofa GN=CDH2 PE=3 SV=2;>tr|K7GT48|K7GT48_PIG Uncharacterized protein (Fragment) OS=Sus scrofa GN=CDH2 PE=4 SV=1	Cadherin-2	P19022	CDH2	0.0150107	0.343244	0.324723	DAP
>tr|B5KJG2|B5KJG2_PIG Phosphoglycerate mutase 2 OS=Sus scrofa GN=PGAM2 PE=2 SV=1	Phosphoglycerate mutase 2	P15259	PGAM2	0.0161917	0.347109	3.7034	DAP
>tr|Q765P8|Q765P8_PIG Prostaglandin D synthase (Fragment) OS=Sus scrofa GN=pgds PE=2 SV=1	Prostaglandin-H2 D-isomerase	P41222	PTGDS	0.0180196	0.363572	0.633257	DAP
>tr|F1SEX0|F1SEX0_PIG Uncharacterized protein (Fragment) OS=Sus scrofa GN=DDAH1 PE=4 SV=2	N(G),N(G)-dimethylarginine dimethylaminohydrolase 1	B4DGT0	DDAH1	0.0191081	0.364116	3.7033	DAP
>tr|I3LQ51|I3LQ51_PIG Proteasome subunit beta type OS=Sus scrofa GN=PSMB1 PE=3 SV=1	Proteasome subunit beta type-1	P20618	PSMB1	0.0204568	0.369299	8.42522
>tr|F1S8V7|F1S8V7_PIG Uncharacterized protein OS=Sus scrofa GN=CPN1 PE=4 SV=1	Carboxypeptidase N catalytic chain	P15169	CPN1	0.0208964	0.358373	3.00217
>tr|F1SMZ4|F1SMZ4_PIG Uncharacterized protein (Fragment) OS=Sus scrofa GN=DNER PE=4 SV=2	Delta and Notch-like epidermal growth factor-related receptor	Q8NFT8	DNER	0.0219014	0.357723	0.484653
>tr|F1RG22|F1RG22_PIG Uncharacterized protein (Fragment) OS=Sus scrofa GN=RET PE=3 SV=2	Proto-oncogene tyrosine-protein kinase receptor Ret	P07949	RET	0.023732	0.370004	0.450656
>tr|F1SGI7|F1SGI7_PIG Uncharacterized protein (Fragment) OS=Sus scrofa GN=KRT75 PE=3 SV=2	Keratin, type II cytoskeletal 75	O95678	KRT75	0.0244119	0.364056	0.497267
>tr|F1RLF8|F1RLF8_PIG Uncharacterized protein OS=Sus scrofa GN=APLP1 PE=4 SV=2	Amyloid-like protein 1	P51693	APLP1	0.0272828	0.389917	0.425946
>tr|I3LBJ8|I3LBJ8_PIG Creatine kinase M-type OS=Sus scrofa GN=CKM PE=3 SV=1	Creatine kinase M-type	P06732	CKM	0.0273617	0.375403	4.6403
>tr|F1SAM0|F1SAM0_PIG Uncharacterized protein (Fragment) OS=Sus scrofa GN=LOC100515669 PE=3 SV=1;>tr|F1SAM2|F1SAM2_PIG Uncharacterized protein OS=Sus scrofa PE=3 SV=2	Desmocollin-1	Q08554	DSC1	0.0274034	0.361514	0.36873
>tr|F1SGG3|F1SGG3_PIG Uncharacterized protein OS=Sus scrofa GN=KRT1 PE=3 SV=1;>tr|A5A758|A5A758_PIG Keratin 1 (Fragment) OS=Sus scrofa GN=KRT1 PE=2 SV=1	Keratin, type II cytoskeletal 1	P04264	KRT1	0.0281091	0.357089	0.541212
>tr|F1RFA5|F1RFA5_PIG Uncharacterized protein (Fragment) OS=Sus scrofa GN=PGP PE=4 SV=1	Phosphoglycolate phosphatase	A6NDG6	PGP	0.0290265	0.355574	2.37752
>tr|F1S6C7|F1S6C7_PIG Uncharacterized protein (Fragment) OS=Sus scrofa GN=JAM3 PE=4 SV=2	Junctional adhesion molecule C	Q9BX67	JAM3	0.0301416	0.356502	0.554916
>tr|J9JIM3|J9JIM3_PIG Uncharacterized protein OS=Sus scrofa PE=4 SV=1	Glutathione S-transferase omega-1	Q5TA01	GSTO1	0.0319964	0.365825	3.02409
>tr|F1S3Q8|F1S3Q8_PIG Uncharacterized protein OS=Sus scrofa GN=VNN3 PE=4 SV=2	Vascular non-inflammatory molecule 3	Q9NY84	VNN3	0.0330433	0.365609	2.17955
>tr|Q0R678|Q0R678_PIG DJ-1 protein OS=Sus scrofa GN=PARK7 PE=2 SV=1;>tr|F1RII4|F1RII4_PIG Uncharacterized protein OS=Sus scrofa GN=PARK7 PE=4 SV=1	Protein DJ-1	Q99497	PARK7	0.0331284	0.355095	3.32763
>tr|F1RHL9|F1RHL9_PIG Uncharacterized protein OS=Sus scrofa GN=ACTN2 PE=4 SV=1	Alpha-actinin-2	P35609	ACTN2	0.0332136	0.345221	5.08508
>tr|K9IVR7|K9IVR7_PIG WD repeat-containing protein 1 OS=Sus scrofa GN=WDR1 PE=2 SV=1	WD repeat-containing protein 1	O75083	WDR1	0.0338474	0.341461	3.7647
>tr|F1RUQ0|F1RUQ0_PIG Uncharacterized protein OS=Sus scrofa GN=IGJ PE=4 SV=1	Immunoglobulin J chain	P01591	IGJ	0.0341763	0.334928	1.54043
>tr|F1RRT3|F1RRT3_PIG Uncharacterized protein OS=Sus scrofa GN=FAM49B PE=4 SV=2	Protein FAM49B	Q9NUQ9	FAM49B	0.0351027	0.33445	1.66329
>tr|F1RXC2|F1RXC2_PIG Uncharacterized protein (Fragment) OS=Sus scrofa GN=CA2 PE=4 SV=1	Carbonic anhydrase 2	P00918	CA2	0.0363567	0.337037	3.31138
>tr|A5A759|A5A759_PIG Keratin 2A OS=Sus scrofa GN=KRT2A PE=2 SV=1	Keratin, type II cytoskeletal 2 epidermal	P35908	KRT2	0.0383052	0.345755	0.548728
>tr|I3LDS3|I3LDS3_PIG Uncharacterized protein OS=Sus scrofa GN=KRT10 PE=3 SV=1	Keratin, type I cytoskeletal 10	P13645	KRT10	0.0385059	0.338654	0.541378
>tr|F1SER9|F1SER9_PIG Uncharacterized protein OS=Sus scrofa GN=FAT1 PE=4 SV=2	Protocadherin Fat 1	Q14517	FAT1	0.0387408	0.332202	0.608024
>tr|F1S3U9|F1S3U9_PIG Uncharacterized protein OS=Sus scrofa GN=PRDX1 PE=4 SV=2	Peroxiredoxin-1	Q06830	PRDX1	0.0390543	0.326722	4.42232
>tr|I3LR43|I3LR43_PIG Uncharacterized protein OS=Sus scrofa GN=PEPD PE=3 SV=1	Xaa-Pro dipeptidase	P12955	PEPD	0.0394116	0.321862	2.37517
>tr|F1RW32|F1RW32_PIG Uncharacterized protein OS=Sus scrofa GN=SPARCL1 PE=4 SV=1	SPARC-like protein 1	Q14515	SPARCL1	0.0394367	0.314577	0.50972
>tr|I3LJ52|I3LJ52_PIG Uncharacterized protein OS=Sus scrofa GN=LOC100621642 PE=3 SV=1	Chymotrypsinogen B2/Chymotrypsinogen B	Q6GPI1;P17538	CTRB2	0.0397891	0.310174	0.599327
>tr|M4M654|M4M654_PIG Regenerating islet-derived family member 3 isoform 1 OS=Sus scrofa PE=2 SV=1;>tr|F1SNX1|F1SNX1_PIG Uncharacterized protein OS=Sus scrofa GN=LOC100520832 PE=4 SV=1;>tr|B8YGC1|B8YGC1_PIG Regenerating islet-derived family member 3 isofor	Regenerating islet-derived protein 3-alpha	Q06141	REG3A	0.0434921	0.331506	0.545261
>tr|I3LR17|I3LR17_PIG Uncharacterized protein OS=Sus scrofa GN=CORO1A PE=4 SV=1	Coronin-1A	P31146	CORO1A	0.0451869	0.336937	6.1476
>tr|F1SRR8|F1SRR8_PIG Uncharacterized protein (Fragment) OS=Sus scrofa PE=4 SV=2	Maltase-glucoamylase, intestinal	O43451	MGAM	0.0459353	0.33523	1.58441
>tr|F1S5D0|F1S5D0_PIG Uncharacterized protein OS=Sus scrofa GN=BST1 PE=4 SV=2;>tr|I3L8B9|I3L8B9_PIG Uncharacterized protein OS=Sus scrofa GN=BST1 PE=4 SV=1;>tr|K7GKB6|K7GKB6_PIG Uncharacterized protein OS=Sus scrofa GN=BST1 PE=4 SV=1;>tr|K7GN83|K7GN83_PIG	ADP-ribosyl cyclase/cyclic ADP-ribose hydrolase 2	Q10588	BST1	0.0464021	0.331582	0.660177
>tr|F1SGG6|F1SGG6_PIG Uncharacterized protein (Fragment) OS=Sus scrofa GN=KRT5 PE=3 SV=2	Keratin, type II cytoskeletal 5	P13647	KRT5	0.0478607	0.335025	0.583945
>tr|F1S703|F1S703_PIG Uncharacterized protein OS=Sus scrofa GN=PAPPA2 PE=4 SV=2	Pappalysin-2	Q9BXP8	PAPPA2	0.0487802	0.334632	0.653771
>tr|F1SSL6|F1SSL6_PIG Proteasome subunit alpha type OS=Sus scrofa GN=LOC100154408 PE=3 SV=1	Proteasome subunit alpha type-3	P25788	PSMA3	0.0491251	0.33039	3.77867
>tr|F1RYY6|F1RYY6_PIG Transaldolase (Fragment) OS=Sus scrofa GN=TALDO1 PE=3 SV=2	Transaldolase	P37837	TALDO1	0.0500897	0.3304	1.78269
>tr|F1SG31|F1SG31_PIG Uncharacterized protein OS=Sus scrofa GN=LOC100521533 PE=4 SV=2				0.0505217	0.326961	0.566722
>tr|I3L9G0|I3L9G0_PIG Uncharacterized protein (Fragment) OS=Sus scrofa PE=4 SV=1				0.0515736	0.327588	1.83919
>tr|F1SU98|F1SU98_PIG Uncharacterized protein OS=Sus scrofa GN=C10orf54 PE=4 SV=1				0.0515952	0.321767	0.623551
>tr|Q2EN74|Q2EN74_PIG Epidermal fatty acid-binding protein OS=Sus scrofa GN=FABP5 PE=2 SV=1;>tr|Q19KE2|Q19KE2_PIG Fatty acid binding protein 5 (Fragment) OS=Sus scrofa GN=FABP5 PE=2 SV=1				0.0520911	0.319058	0.584597
>tr|A8D737|A8D737_PIG T-cadherin OS=Sus scrofa PE=2 SV=1				0.0522971	0.3147	0.618182
>tr|F1SDX9|F1SDX9_PIG Peroxiredoxin-2 OS=Sus scrofa GN=PRDX2 PE=4 SV=2				0.0526648	0.311449	6.34278
>tr|F1RHF0|F1RHF0_PIG Ubiquitin carboxyl-terminal hydrolase isozyme L3 (Fragment) OS=Sus scrofa GN=UCHL3 PE=4 SV=2				0.0536272	0.311765	3.12431
>tr|F1RXY7|F1RXY7_PIG Uncharacterized protein OS=Sus scrofa GN=TSN PE=4 SV=2				0.0540443	0.308953	2.65096
>tr|F2Z5B1|F2Z5B1_PIG Leukocyte elastase inhibitor OS=Sus scrofa GN=SERPINB1 PE=2 SV=1				0.0545487	0.306724	1.60876
>tr|L8B0Y6|L8B0Y6_PIG IgG heavy chain OS=Sus scrofa GN=IGHG PE=2 SV=1				0.0550373	0.30448	1.70194
>tr|I3LUM4|I3LUM4_PIG Uncharacterized protein OS=Sus scrofa GN=OAF PE=4 SV=1				0.0554865	0.302093	0.575111
>tr|I3LRH7|I3LRH7_PIG Uncharacterized protein OS=Sus scrofa GN=DSC3 PE=4 SV=1				0.056089	0.300602	0.526414
>tr|F1RXC1|F1RXC1_PIG Uncharacterized protein OS=Sus scrofa GN=CA1 PE=4 SV=1				0.0569901	0.300733	2.78435
>tr|F1SDJ8|F1SDJ8_PIG Uncharacterized protein OS=Sus scrofa GN=GLRX3 PE=4 SV=1				0.0575286	0.298975	2.6963
>tr|F1SMN5|F1SMN5_PIG Uncharacterized protein OS=Sus scrofa GN=FLNC PE=4 SV=1				0.0576714	0.295243	23.0592
>tr|F1RVS9|F1RVS9_PIG Uncharacterized protein OS=Sus scrofa GN=PI16 PE=4 SV=1				0.0587151	0.296166	0.550546
>tr|K7GS06|K7GS06_PIG Uncharacterized protein OS=Sus scrofa GN=FHL1C PE=4 SV=1;>tr|Q9GJV4|Q9GJV4_PIG Four and a half LIM domains 1 protein, isoform C OS=Sus scrofa GN=fhl1C PE=2 SV=1;>tr|K7GMC3|K7GMC3_PIG Uncharacterized protein OS=Sus scrofa GN=FHL1C PE=4				0.0594107	0.295332	21.4048
>tr|I3LLI8|I3LLI8_PIG Uncharacterized protein (Fragment) OS=Sus scrofa PE=4 SV=1				0.0600012	0.294006	2.42005
>tr|F2Z5B6|F2Z5B6_PIG Tropomyosin alpha-1 chain OS=Sus scrofa GN=TPM1 PE=3 SV=1				0.0600338	0.290022	8.65811
>tr|F1RHN3|F1RHN3_PIG Catechol O-methyltransferase OS=Sus scrofa GN=COMT PE=4 SV=1;>tr|D3K5L3|D3K5L3_PIG Catechol-O-methyltransferase OS=Sus scrofa GN=COMT PE=2 SV=1				0.0602981	0.287253	3.71871
>tr|I3LDM6|I3LDM6_PIG Uncharacterized protein OS=Sus scrofa GN=KRT3 PE=3 SV=1				0.06219	0.292208	0.603986
>tr|F1RK02|F1RK02_PIG Uncharacterized protein (Fragment) OS=Sus scrofa GN=LCP1 PE=4 SV=2				0.0627156	0.290695	1.62626
>tr|F1S0L1|F1S0L1_PIG Uncharacterized protein OS=Sus scrofa GN=KRT14 PE=3 SV=2				0.0632579	0.2893	0.612384
>tr|I3LQH7|I3LQH7_PIG Uncharacterized protein OS=Sus scrofa GN=BLVRB PE=4 SV=1				0.0634402	0.286316	2.03267
>tr|F1STC5|F1STC5_PIG Uncharacterized protein OS=Sus scrofa GN=Ssc.15776 PE=4 SV=2				0.0634425	0.282608	1.97385
>tr|I3LUM7|I3LUM7_PIG Uncharacterized protein OS=Sus scrofa GN=KRT31 PE=3 SV=1;>tr|F6PWF7|F6PWF7_PIG Uncharacterized protein OS=Sus scrofa GN=LOC100623387 PE=4 SV=1				0.0656451	0.28867	0.343623
>tr|F1RP44|F1RP44_PIG Uncharacterized protein (Fragment) OS=Sus scrofa GN=IPO5 PE=4 SV=1				0.0676247	0.293611	7.60214
>tr|F1RYN3|F1RYN3_PIG Uncharacterized protein OS=Sus scrofa GN=GLDN PE=4 SV=1				0.0683553	0.293073	0.619847
>tr|Q29096|Q29096_PIG Proteasome subunit C9-like protein (Fragment) OS=Sus scrofa PE=2 SV=2;>tr|F2Z528|F2Z528_PIG Proteasome subunit alpha type OS=Sus scrofa GN=PSMA4 PE=3 SV=1				0.0689486	0.291968	2.71769
>tr|F1S849|F1S849_PIG Uncharacterized protein OS=Sus scrofa GN=CNNM2 PE=4 SV=2				0.0709002	0.29657	0.640302
>tr|F1RLQ9|F1RLQ9_PIG Uncharacterized protein (Fragment) OS=Sus scrofa PE=4 SV=2				0.0736878	0.304517	6.9365
>tr|Q001C6|Q001C6_PIG NDRG2 OS=Sus scrofa PE=2 SV=1;>tr|D4PEM8|D4PEM8_PIG N-Myc downstream regulated gene 2 OS=Sus scrofa GN=NDRG2 PE=2 SV=1;>tr|I3LFI3|I3LFI3_PIG Uncharacterized protein OS=Sus scrofa GN=NDRG2 PE=4 SV=1				0.0737192	0.30102	5.09963
>tr|F1RW81|F1RW81_PIG Uncharacterized protein OS=Sus scrofa GN=SSC.1664 PE=4 SV=1				0.0743976	0.300216	0.182896
>tr|A4H2R5|A4H2R5_PIG Secreted protein, acidic, cysteine-rich (Fragment) OS=Sus scrofa GN=SPARC PE=2 SV=1;>tr|F1RQB3|F1RQB3_PIG Uncharacterized protein (Fragment) OS=Sus scrofa PE=4 SV=2				0.0746672	0.297801	0.544525
>tr|F1SSV9|F1SSV9_PIG Uncharacterized protein (Fragment) OS=Sus scrofa GN=TYRO3 PE=4 SV=1				0.0763631	0.301064	0.612451
>tr|F1RKG9|F1RKG9_PIG Uncharacterized protein OS=Sus scrofa GN=TAOK3 PE=4 SV=1				0.0790285	0.308032	0.550741
>tr|F1SK58|F1SK58_PIG Uncharacterized protein OS=Sus scrofa GN=HSPA13 PE=3 SV=1;>tr|Q8MJ95|Q8MJ95_PIG Stress 60 protein chaperone (Fragment) OS=Sus scrofa PE=4 SV=1				0.0802473	0.309268	0.61491
>tr|F1RVE7|F1RVE7_PIG Integrin beta OS=Sus scrofa GN=ITGB1 PE=3 SV=1;>tr|K7GS94|K7GS94_PIG Integrin beta OS=Sus scrofa GN=ITGB1 PE=3 SV=1				0.0803419	0.306192	1.72517
>tr|K7ZJQ0|K7ZJQ0_PIG IgE heavy chain constant region (Fragment) OS=Sus scrofa GN=IGHE PE=4 SV=1				0.080895	0.304912	2.8205
>tr|L8B0W0|L8B0W0_PIG IgG heavy chain OS=Sus scrofa GN=IGHG PE=2 SV=1				0.0826892	0.308287	1.51796
>tr|F1RVM1|F1RVM1_PIG Uncharacterized protein OS=Sus scrofa GN=LOC100518202 PE=4 SV=1;>tr|I3LUC7|I3LUC7_PIG Uncharacterized protein OS=Sus scrofa GN=LOC100517662 PE=4 SV=1				0.0845549	0.311853	4.24814
>tr|F1STC1|F1STC1_PIG Ribose-5-phosphate isomerase OS=Sus scrofa GN=RPIA PE=3 SV=1				0.087894	0.320719	3.454
>tr|K7GR52|K7GR52_PIG Uncharacterized protein OS=Sus scrofa GN=FGFR1 PE=4 SV=1;>tr|F1RZJ8|F1RZJ8_PIG Fibroblast growth factor receptor OS=Sus scrofa GN=FGFR1 PE=3 SV=3;>tr|K7GKU3|K7GKU3_PIG Fibroblast growth factor receptor OS=Sus scrofa GN=FGFR1 PE=3 SV=1				0.0892475	0.322231	0.629747
>tr|F1RGX7|F1RGX7_PIG Uncharacterized protein OS=Sus scrofa GN=HBZ PE=3 SV=1				0.0895329	0.319894	6.08675
>tr|I3LEZ3|I3LEZ3_PIG Uncharacterized protein OS=Sus scrofa GN=LSAMP PE=4 SV=1				0.0898974	0.317885	0.656232
>tr|F1S557|F1S557_PIG Uncharacterized protein OS=Sus scrofa GN=AGL PE=4 SV=1				0.0909486	0.31832	5.11202
>tr|F1RS37|F1RS37_PIG Uncharacterized protein OS=Sus scrofa GN=POSTN PE=4 SV=1				0.0912984	0.316317	1.53999
>tr|F1SA60|F1SA60_PIG Uncharacterized protein (Fragment) OS=Sus scrofa GN=SPTB PE=4 SV=1				0.0933459	0.320176	16.1548
>tr|F1S6G4|F1S6G4_PIG Uncharacterized protein (Fragment) OS=Sus scrofa GN=TXNDC12 PE=4 SV=2				0.0934289	0.317288	0.659164
>tr|U3GT97|U3GT97_PIG Fstl1 OS=Sus scrofa PE=2 SV=1				0.0967151	0.325228	0.657219
>tr|B7U4X2|B7U4X2_PIG Angiopoietin-like protein 7 OS=Sus scrofa GN=Angptl7 PE=2 SV=1				0.0976082	0.325045	0.643986
>tr|A6M930|A6M930_PIG Eukaryotic translation initiation factor 4A isoform 2 OS=Sus scrofa GN=EIF4A2 PE=2 SV=1;>tr|A6M929|A6M929_PIG Eukaryotic translation initiation factor 4A isoform 2 OS=Sus scrofa GN=EIF4A2 PE=3 SV=1				0.0977073	0.322246	5.6739
>tr|I3LR69|I3LR69_PIG Ferritin OS=Sus scrofa GN=FTH1 PE=3 SV=1				0.0978834	0.319753	2.66718
>tr|L8B173|L8B173_PIG IgG heavy chain OS=Sus scrofa GN=IGHG PE=2 SV=1				0.100236	0.324349	1.64242
>tr|F1RN62|F1RN62_PIG Uncharacterized protein OS=Sus scrofa GN=SLCO4C1 PE=4 SV=2				0.100353	0.321692	0.504273
>tr|F1S6Q3|F1S6Q3_PIG Uncharacterized protein OS=Sus scrofa GN=CILP2 PE=4 SV=1				0.100678	0.319746	1.96302
>tr|F1SIX3|F1SIX3_PIG UTP--glucose-1-phosphate uridylyltransferase (Fragment) OS=Sus scrofa GN=UGP2 PE=4 SV=2				0.101997	0.320964	4.24585
>tr|Q2XVP5|Q2XVP5_PIG Microtubule-associated protein RP/EB family member 1 OS=Sus scrofa GN=MAPRE1 PE=2 SV=1				0.102226	0.318759	3.5593
>tr|I3LU56|I3LU56_PIG Uncharacterized protein OS=Sus scrofa PE=2 SV=1;>tr|K9J4V8|K9J4V8_PIG ICOS ligand OS=Sus scrofa GN=ICOSLG PE=2 SV=1				0.103042	0.318409	0.535493
>tr|F1S4I1|F1S4I1_PIG Uncharacterized protein OS=Sus scrofa PE=4 SV=2				0.103268	0.316258	0.658451
>tr|F1RI15|F1RI15_PIG Uncharacterized protein OS=Sus scrofa GN=HSPA4 PE=3 SV=1				0.103537	0.314275	3.94362
>tr|F1S6D0|F1S6D0_PIG Uncharacterized protein (Fragment) OS=Sus scrofa GN=NTM PE=4 SV=2				0.103575	0.311634	0.665721
>tr|F1SU00|F1SU00_PIG Uncharacterized protein (Fragment) OS=Sus scrofa PE=4 SV=1				0.103785	0.309551	3.33375
>tr|A5D9L6|A5D9L6_PIG Apolipoprotein M OS=Sus scrofa GN=APOM PE=4 SV=1				0.103816	0.306972	1.65652
>tr|F1RII7|F1RII7_PIG Hemoglobin subunit beta OS=Sus scrofa GN=HBB PE=3 SV=1;>tr|A7YB43|A7YB43_PIG Beta-globin (Fragment) OS=Sus scrofa PE=2 SV=1				0.103973	0.30481	1.71183
>tr|F1SLU6|F1SLU6_PIG Ubiquitin carboxyl-terminal hydrolase OS=Sus scrofa GN=USP5 PE=3 SV=2				0.104069	0.302506	9.5869
>tr|B6VNT8|B6VNT8_PIG Cardiac muscle alpha actin 1 OS=Sus scrofa GN=ACTC1 PE=2 SV=1;>tr|C7AI81|C7AI81_PIG Actin alpha 2 OS=Sus scrofa GN=ACTA2 PE=2 SV=1;>tr|F1SLG5|F1SLG5_PIG Uncharacterized protein OS=Sus scrofa GN=ACTG2 PE=3 SV=2;>tr|B2ZFN7|B2ZFN7_PIG Ac				0.104443	0.301042	8.75347
>tr|F2Z4Z1|F2Z4Z1_PIG Uncharacterized protein OS=Sus scrofa GN=YWHAG PE=3 SV=1				0.107202	0.306419	2.72079
>tr|I3LAQ0|I3LAQ0_PIG Uncharacterized protein OS=Sus scrofa GN=IGKC PE=4 SV=1				0.107875	0.305795	1.74216
>tr|F1SA96|F1SA96_PIG Uncharacterized protein OS=Sus scrofa GN=IAH1 PE=4 SV=2				0.109449	0.307712	2.13161
>tr|F1SQR8|F1SQR8_PIG Leukotriene A-4 hydrolase OS=Sus scrofa GN=LTA4H PE=2 SV=2;>tr|E0D7H7|E0D7H7_PIG Aminopeptidase T OS=Sus scrofa GN=AmpT PE=2 SV=1;>tr|D0G776|D0G776_PIG Leukotriene A4 hydrolase OS=Sus scrofa GN=LTA4H PE=2 SV=1				0.109492	0.305332	1.97322
>tr|Q28939|Q28939_PIG Vascular cell adhesion molecule OS=Sus scrofa PE=2 SV=1;>tr|Q29123|Q29123_PIG Vascular cell adhesion molecule OS=Sus scrofa GN=VCAM PE=2 SV=1				0.109554	0.303042	0.660295
>tr|F1S5N8|F1S5N8_PIG Uncharacterized protein (Fragment) OS=Sus scrofa PE=3 SV=2				0.110049	0.301976	5.20501
>tr|F1SE30|F1SE30_PIG Uncharacterized protein OS=Sus scrofa GN=ANK1 PE=4 SV=2				0.111383	0.303208	12.9679
>tr|F1RT17|F1RT17_PIG N(4)-(Beta-N-acetylglucosaminyl)-L-asparaginase (Fragment) OS=Sus scrofa GN=AGA PE=4 SV=1				0.111798	0.301943	2.03126
>tr|F1SIH8|F1SIH8_PIG Uncharacterized protein OS=Sus scrofa GN=LOC100516776 PE=3 SV=2				0.112272	0.300853	9.93532
>tr|I3LQK2|I3LQK2_PIG Uncharacterized protein OS=Sus scrofa GN=LOC100624138 PE=4 SV=1;>tr|Q9GKJ6|Q9GKJ6_PIG Butyrylcholinesterase (Fragment) OS=Sus scrofa GN=BCHE PE=4 SV=1;>tr|G5CWF3|G5CWF3_PIG Butyrylcholinesterase (Fragment) OS=Sus scrofa GN=BCHE PE=4 S				0.113491	0.301763	0.569002
>tr|A3EX84|A3EX84_PIG Galectin OS=Sus scrofa GN=LGALS3 PE=2 SV=1				0.115431	0.304561	4.96425
>tr|F1RLP4|F1RLP4_PIG EFNB2 OS=Sus scrofa GN=EFNB2 PE=2 SV=2;>tr|B0LDS8|B0LDS8_PIG Ephrin-B2 OS=Sus scrofa GN=efnB2 PE=2 SV=1				0.115619	0.302728	0.603238
>tr|I3LHC8|I3LHC8_PIG Uncharacterized protein OS=Sus scrofa GN=LOC100522692 PE=4 SV=1				0.116295	0.302191	1.75956
>tr|I3LF84|I3LF84_PIG Uncharacterized protein OS=Sus scrofa GN=RAP1A PE=4 SV=1;>tr|I3L5L1|I3L5L1_PIG Uncharacterized protein OS=Sus scrofa GN=RAP1A PE=4 SV=1;>tr|F2Z5K3|F2Z5K3_PIG Uncharacterized protein OS=Sus scrofa GN=RAP1A PE=4 SV=2				0.117402	0.302774	2.55675
>tr|I3LVS6|I3LVS6_PIG Uncharacterized protein OS=Sus scrofa GN=LOC100523123 PE=3 SV=1				0.118919	0.304398	0.632652
>tr|F2Z4Y1|F2Z4Y1_PIG Uncharacterized protein OS=Sus scrofa GN=YWHAH PE=3 SV=1				0.119087	0.302569	2.90197
>tr|F1S7T8|F1S7T8_PIG Uncharacterized protein OS=Sus scrofa GN=LRP11 PE=4 SV=1				0.121008	0.305189	0.65286
>tr|O77732|O77732_PIG Glutathione peroxidase (Fragment) OS=Sus scrofa PE=2 SV=1				0.122173	0.305877	13.9311
>tr|K7GR72|K7GR72_PIG Uncharacterized protein OS=Sus scrofa GN=SLC4A1 PE=4 SV=1;>tr|F1RQY6|F1RQY6_PIG Uncharacterized protein (Fragment) OS=Sus scrofa GN=SLC4A1 PE=4 SV=2				0.123602	0.307215	88.9352
>tr|F1SGS9|F1SGS9_PIG Catalase OS=Sus scrofa GN=CAT PE=3 SV=1				0.125777	0.310369	7.22437
>tr|Q6QA25|Q6QA25_PIG Tropomyosin 3 OS=Sus scrofa GN=TPM3 PE=2 SV=1;>tr|Q2XQY5|Q2XQY5_PIG Tropomyosin 3 OS=Sus scrofa GN=tpm3 PE=2 SV=1;>tr|F1RGK5|F1RGK5_PIG Tropomyosin alpha-3 chain OS=Sus scrofa GN=TPM3 PE=3 SV=2;>tr|Q29219|Q29219_PIG Tropomysin, cytosk				0.126016	0.30874	5.33007
>tr|F1SFF8|F1SFF8_PIG Phosphorylase OS=Sus scrofa GN=PYGL PE=3 SV=2;>tr|B1A8Z3|B1A8Z3_PIG Phosphorylase OS=Sus scrofa PE=2 SV=1				0.126339	0.307336	14.92
>tr|I3LD22|I3LD22_PIG Uncharacterized protein OS=Sus scrofa GN=COCH PE=4 SV=1				0.127213	0.307281	19.276
>tr|F1RFQ7|F1RFQ7_PIG GTP-binding nuclear protein Ran OS=Sus scrofa GN=RAN PE=2 SV=2				0.12741	0.305607	4.39469
>tr|F1S9Q3|F1S9Q3_PIG Uncharacterized protein OS=Sus scrofa PE=3 SV=2;>tr|F1S9Q1|F1S9Q1_PIG Uncharacterized protein OS=Sus scrofa PE=3 SV=2				0.1275	0.303699	5.03362
>tr|D0G7F7|D0G7F7_PIG Tropomyosin 4 OS=Sus scrofa GN=TPM4 PE=2 SV=1				0.132152	0.312609	5.65776
>tr|F1SDR7|F1SDR7_PIG Uncharacterized protein OS=Sus scrofa GN=YWHAB PE=3 SV=1				0.132378	0.310998	2.19124
>tr|F8SUW1|F8SUW1_PIG Ubiquitin C-terminal hydrolase 1 (Fragment) OS=Sus scrofa PE=4 SV=1;>tr|I3L7W1|I3L7W1_PIG Ubiquitin carboxyl-terminal hydrolase isozyme L1 OS=Sus scrofa GN=UCHL1 PE=4 SV=1				0.13266	0.309541	2.55489
>tr|F1S0B9|F1S0B9_PIG Uncharacterized protein OS=Sus scrofa GN=EIF4E PE=3 SV=1				0.135583	0.314223	5.41535
>tr|F1SH92|F1SH92_PIG Inter-alpha-trypsin inhibitor heavy chain H4 OS=Sus scrofa GN=ITIH4 PE=4 SV=2				0.1363	0.313765	1.943
>tr|F1S9Z1|F1S9Z1_PIG Heat shock protein HSP 90-alpha OS=Sus scrofa GN=HSP90AA1 PE=4 SV=2				0.13682	0.312862	6.0469
>tr|K9IVR9|K9IVR9_PIG Importin subunit beta-1 OS=Sus scrofa GN=KPNB1 PE=2 SV=1;>tr|F1RWJ5|F1RWJ5_PIG Uncharacterized protein OS=Sus scrofa GN=KPNB1 PE=4 SV=2				0.137158	0.311559	8.01192
>tr|F2Z5R6|F2Z5R6_PIG Uncharacterized protein OS=Sus scrofa GN=LOC100514460 PE=4 SV=1;>tr|F1RYI3|F1RYI3_PIG Uncharacterized protein OS=Sus scrofa GN=CAND1 PE=4 SV=2				0.138503	0.312543	6.26005
>tr|D0G7F6|D0G7F6_PIG Triosephosphate isomerase OS=Sus scrofa GN=TPI1 PE=2 SV=1;>tr|Q1PC32|Q1PC32_PIG Triosephosphate isomerase (Fragment) OS=Sus scrofa PE=3 SV=1;>tr|Q1W5B8|Q1W5B8_PIG Triosephosphate isomerase OS=Sus scrofa GN=TPI1 PE=2 SV=1				0.138668	0.310869	2.24789
>tr|I3VKE6|I3VKE6_PIG Ceruloplasmin OS=Sus scrofa PE=2 SV=1				0.140164	0.312183	1.57549
>tr|Q6UV40|Q6UV40_PIG Fructose-bisphosphate aldolase A (Fragment) OS=Sus scrofa GN=ALDOA PE=4 SV=1				0.140539	0.310998	1.70644
>tr|C9VZX4|C9VZX4_PIG Matrix metallopeptidase 1 OS=Sus scrofa GN=MMP1 PE=4 SV=1;>tr|C9VZX3|C9VZX3_PIG Matrix metallopeptidase 1 OS=Sus scrofa GN=MMP1 PE=2 SV=1				0.142758	0.313885	0.448336
>tr|Q9TUY2|Q9TUY2_PIG Glyceraldehyde-3-phosphate dehydrogenase (Fragment) OS=Sus scrofa GN=GAPDH PE=2 SV=1;>tr|Q0QES9|Q0QES9_PIG Glyceraldehyde-3-phosphate dehydrogenase (Fragment) OS=Sus scrofa GN=GAPDH PE=2 SV=1;>tr|Q9TT74|Q9TT74_PIG Glyceraldehyde-3-pho				0.144324	0.315307	3.35346
>tr|F1RQU2|F1RQU2_PIG Uncharacterized protein OS=Sus scrofa GN=HSPCB PE=2 SV=1				0.144891	0.314542	4.67761
>tr|K7GQQ3|K7GQQ3_PIG Poliovirus receptor-related protein 1 OS=Sus scrofa GN=PVRL1 PE=4 SV=1;>tr|F1S9T6|F1S9T6_PIG Poliovirus receptor-related protein 1 OS=Sus scrofa GN=PVRL1 PE=4 SV=2;>tr|F1S9T5|F1S9T5_PIG Uncharacterized protein (Fragment) OS=Sus scrofa				0.145489	0.313853	0.652513
>tr|Q06AS6|Q06AS6_PIG GBI2 OS=Sus scrofa GN=GBI1 PE=2 SV=1;>tr|Q06AS7|Q06AS7_PIG GBI1 OS=Sus scrofa PE=2 SV=1;>tr|Q28946|Q28946_PIG Gi-alpha-2 protein (Fragment) OS=Sus scrofa PE=2 SV=1				0.145977	0.312939	16.7674
>tr|F1SA98|F1SA98_PIG Uncharacterized protein (Fragment) OS=Sus scrofa GN=YWHAQ PE=3 SV=2;>tr|A4IE76|A4IE76_PIG Tyrosine 3-monooxygenase/tryptophan 5-monooxygenase activation protein, theta polypeptide (Fragment) OS=Sus scrofa GN=YWHAQ PE=2 SV=1				0.14634	0.311767	3.28309
>tr|K9IWG6|K9IWG6_PIG Spectrin beta chain, brain 1 (Fragment) OS=Sus scrofa GN=SPTBN1 PE=2 SV=1				0.14704	0.311325	16.653
>tr|I3LDM3|I3LDM3_PIG Uncharacterized protein (Fragment) OS=Sus scrofa GN=IPO7 PE=4 SV=1				0.147519	0.310424	24.622
>tr|I3L8N9|I3L8N9_PIG Uncharacterized protein OS=Sus scrofa GN=GRIA4 PE=4 SV=1				0.148418	0.31041	0.626276
>tr|F1SQW8|F1SQW8_PIG Uncharacterized protein OS=Sus scrofa GN=ARHGDIB PE=4 SV=2;>tr|Q29180|Q29180_PIG Rho protein dissociation inhibitor homolog (Fragment) OS=Sus scrofa PE=2 SV=1				0.153736	0.319584	2.10676
>tr|F1RTT3|F1RTT3_PIG Uncharacterized protein OS=Sus scrofa GN=COL9A1 PE=4 SV=2				0.15516	0.320602	1.55075
>tr|D0G0C3|D0G0C3_PIG Adenosylhomocysteinase OS=Sus scrofa GN=AHCY PE=2 SV=1;>tr|F1S4Y7|F1S4Y7_PIG Adenosylhomocysteinase (Fragment) OS=Sus scrofa GN=AHCY PE=3 SV=1				0.155545	0.319474	3.95597
>tr|I3LJA6|I3LJA6_PIG Uncharacterized protein (Fragment) OS=Sus scrofa GN=LOC100626178 PE=4 SV=1				0.155746	0.317982	1.655
>tr|F1SQ01|F1SQ01_PIG Uncharacterized protein OS=Sus scrofa GN=PRDX4 PE=4 SV=1				0.15621	0.317042	2.24944
>tr|B5APU7|B5APU7_PIG Actin related protein 2/3 complex subunit 2 OS=Sus scrofa PE=2 SV=1;>tr|F1SS01|F1SS01_PIG Uncharacterized protein (Fragment) OS=Sus scrofa GN=ARPC2 PE=4 SV=2				0.156351	0.315462	3.48713
>tr|E7EI20|E7EI20_PIG Rho GDP dissociation inhibitor alpha OS=Sus scrofa GN=ARHGDIA PE=2 SV=1				0.15667	0.314256	2.50632
>tr|F1STC2|F1STC2_PIG Uncharacterized protein OS=Sus scrofa GN=LOC100625243 PE=4 SV=1;>tr|I3LBK0|I3LBK0_PIG Uncharacterized protein OS=Sus scrofa PE=4 SV=1				0.159071	0.317217	1.52951
>tr|F1SJT7|F1SJT7_PIG Apolipoprotein A-IV OS=Sus scrofa GN=APOA4 PE=3 SV=2				0.159904	0.317034	1.81042
>tr|A5D9L2|A5D9L2_PIG Collagen type XI alpha 2 OS=Sus scrofa GN=COL11A2 PE=4 SV=1;>tr|F1S2C1|F1S2C1_PIG Uncharacterized protein OS=Sus scrofa GN=LOC100520915 PE=4 SV=2;>tr|K7GST7|K7GST7_PIG Uncharacterized protein OS=Sus scrofa GN=LOC100520915 PE=4 SV=1;>t				0.160512	0.316412	2.13394
>tr|I3L9J5|I3L9J5_PIG Uncharacterized protein OS=Sus scrofa PE=4 SV=1				0.16177	0.317069	0.605107
>tr|K7GKJ8|K7GKJ8_PIG Phosphoglycerate kinase (Fragment) OS=Sus scrofa GN=PGK1 PE=3 SV=1;>tr|F1RPH0|F1RPH0_PIG Phosphoglycerate kinase (Fragment) OS=Sus scrofa GN=PGK1 PE=3 SV=2;>tr|D0G784|D0G784_PIG Phosphoglycerate kinase (Fragment) OS=Sus scrofa GN=PGK1				0.162018	0.31575	3.90334
>tr|F1SB42|F1SB42_PIG Uncharacterized protein (Fragment) OS=Sus scrofa GN=EZR PE=4 SV=1				0.163333	0.316516	4.0352
>tr|F1RR78|F1RR78_PIG Uncharacterized protein OS=Sus scrofa GN=LOC100049693 PE=4 SV=2				0.163781	0.3156	12.968
>tr|I3LVL5|I3LVL5_PIG Uncharacterized protein OS=Sus scrofa GN=CRISP3 PE=4 SV=1;>tr|B2ZGN3|B2ZGN3_PIG Cysteine-rich secretory protein 3 (Fragment) OS=Sus scrofa PE=2 SV=1;>tr|K7GKZ6|K7GKZ6_PIG Uncharacterized protein (Fragment) OS=Sus scrofa GN=CRISP3 PE=4				0.164621	0.315448	4.16878
>tr|I3LLS7|I3LLS7_PIG Uncharacterized protein (Fragment) OS=Sus scrofa GN=XPO1 PE=4 SV=1				0.164653	0.313756	9.94238
>tr|F1RNB8|F1RNB8_PIG Uncharacterized protein OS=Sus scrofa GN=SPTA1 PE=4 SV=2				0.164901	0.312491	33.4099
>tr|C0MHR2|C0MHR2_PIG Clathrin heavy chain OS=Sus scrofa GN=CLTC PE=2 SV=1;>tr|K7GQL8|K7GQL8_PIG Uncharacterized protein (Fragment) OS=Sus scrofa GN=CLTC PE=4 SV=1;>tr|F6PV15|F6PV15_PIG Uncharacterized protein (Fragment) OS=Sus scrofa GN=CLTC PE=4 SV=1				0.165013	0.310987	3.86804
>tr|I3LEW3|I3LEW3_PIG Uncharacterized protein OS=Sus scrofa PE=4 SV=1				0.165377	0.30997	0.613422
>tr|F1SME6|F1SME6_PIG Uncharacterized protein OS=Sus scrofa PE=4 SV=2				0.1689	0.314851	7.19348
>tr|F1RGX4|F1RGX4_PIG Uncharacterized protein OS=Sus scrofa GN=LOC100737768 PE=3 SV=1;>tr|K7GLP2|K7GLP2_PIG Uncharacterized protein OS=Sus scrofa GN=LOC100737768 PE=3 SV=1;>tr|K7GM56|K7GM56_PIG Uncharacterized protein (Fragment) OS=Sus scrofa GN=LOC1007377				0.169786	0.314793	1.50491
>tr|F1RM62|F1RM62_PIG Uncharacterized protein OS=Sus scrofa GN=HSPB6 PE=3 SV=1;>tr|I3LIP0|I3LIP0_PIG Uncharacterized protein (Fragment) OS=Sus scrofa PE=4 SV=1;>tr|Q5IZU9|Q5IZU9_PIG Heat shock protein 20kDa (Fragment) OS=Sus scrofa PE=2 SV=1				0.172592	0.318275	7.52198
>tr|F1S902|F1S902_PIG Uncharacterized protein OS=Sus scrofa GN=COMP PE=4 SV=1				0.172954	0.317237	2.14166
>tr|F1RR44|F1RR44_PIG Uncharacterized protein OS=Sus scrofa GN=PPP2R4 PE=4 SV=2				0.173368	0.316305	3.31489
>tr|B5APU3|B5APU3_PIG Actin-related protein 2-like protein OS=Sus scrofa GN=ACTR2 PE=2 SV=1				0.17349	0.314852	3.29253
>tr|I3LEW5|I3LEW5_PIG Uncharacterized protein OS=Sus scrofa GN=PSMD2 PE=4 SV=1				0.17567	0.317131	2.13967
>tr|D0G778|D0G778_PIG Macrophage migration inhibitory factor (Fragment) OS=Sus scrofa GN=MIF PE=2 SV=1				0.17634	0.316673	1.78558
>tr|I3LJ20|I3LJ20_PIG Uncharacterized protein OS=Sus scrofa GN=LOC100521041 PE=4 SV=1				0.179702	0.32103	2.51567
>tr|F1ST01|F1ST01_PIG Uncharacterized protein OS=Sus scrofa GN=SELENBP1 PE=4 SV=1				0.18004	0.319968	1.56957
>tr|I3L8I5|I3L8I5_PIG Uncharacterized protein (Fragment) OS=Sus scrofa GN=EIF6 PE=3 SV=1				0.180221	0.318638	5.15513
>tr|I3LVD5|I3LVD5_PIG Actin, cytoplasmic 1 OS=Sus scrofa GN=ACTB PE=2 SV=1;>tr|A0SNU5|A0SNU5_PIG Beta-actin (Fragment) OS=Sus scrofa PE=2 SV=1;>tr|Q28937|Q28937_PIG Beta actin (Fragment) OS=Sus scrofa PE=2 SV=1				0.186445	0.327952	4.25982
>tr|F1RKX9|F1RKX9_PIG Uncharacterized protein OS=Sus scrofa GN=CRKL PE=4 SV=1				0.187636	0.328363	3.94189
>tr|F1S956|F1S956_PIG Uncharacterized protein (Fragment) OS=Sus scrofa GN=PGLS PE=4 SV=2				0.188375	0.327983	1.99673
>tr|Q1P4F6|Q1P4F6_PRRSV Envelope glycoprotein OS=Porcine reproductive and respiratory syndrome virus PE=4 SV=1				0.188634	0.326776	4.07408
>tr|F1RGX5|F1RGX5_PIG Uncharacterized protein OS=Sus scrofa GN=HBM PE=3 SV=1				0.191382	0.329869	14.3612
>tr|F1RRD6|F1RRD6_PIG Uncharacterized protein (Fragment) OS=Sus scrofa GN=PDCD6IP PE=4 SV=2				0.191899	0.329106	6.67022
>tr|B6A7R0|B6A7R0_PIG Tubulin alpha 3 OS=Sus scrofa PE=2 SV=1;>tr|F1SHQ8|F1SHQ8_PIG Uncharacterized protein OS=Sus scrofa GN=TUBA8 PE=3 SV=1				0.194863	0.332527	5.13815
>tr|G9BWQ4|G9BWQ4_PIG Insulin-like growth factor binding protein 3 OS=Sus scrofa GN=IGFBP3 PE=2 SV=1;>tr|F1ST75|F1ST75_PIG Insulin-like growth factor-binding protein 3 (Fragment) OS=Sus scrofa GN=IGFBP3 PE=4 SV=2				0.198097	0.336373	0.510283
>tr|Q29302|Q29302_PIG Translation elongation factor eEF-1 beta chain (Fragment) OS=Sus scrofa PE=2 SV=1;>tr|F1SHD6|F1SHD6_PIG Uncharacterized protein OS=Sus scrofa GN=EEF1B2 PE=3 SV=1				0.199466	0.337029	4.07909
>tr|Q19PY1|Q19PY1_PIG Phosphorylase (Fragment) OS=Sus scrofa GN=PYGM PE=2 SV=1;>tr|Q19PY2|Q19PY2_PIG Phosphorylase OS=Sus scrofa GN=PYGM PE=2 SV=2;>tr|F1RQQ8|F1RQQ8_PIG Phosphorylase OS=Sus scrofa GN=PYGM PE=3 SV=2				0.19983	0.335989	19.5048
>tr|F1RWJ6|F1RWJ6_PIG Uncharacterized protein OS=Sus scrofa GN=LOC414413 PE=4 SV=1				0.201422	0.337014	1.9455
>tr|F1SA70|F1SA70_PIG Uncharacterized protein OS=Sus scrofa GN=HSPA2 PE=3 SV=1				0.207438	0.345394	3.72216
>tr|F1RI39|F1RI39_PIG Uncharacterized protein OS=Sus scrofa GN=LOC100517284 PE=2 SV=2				0.207778	0.344289	4.91181
>tr|F2Z558|F2Z558_PIG Uncharacterized protein (Fragment) OS=Sus scrofa GN=YWHAZ PE=3 SV=2;>tr|A0SNV3|A0SNV3_PIG Tyrosine 3-monooxygenase/tryptophan 5-monooxygenase activation protein zeta polypeptide (Fragment) OS=Sus scrofa PE=2 SV=1				0.208152	0.343251	2.34433
>tr|F1S325|F1S325_PIG Hydroxypyruvate isomerase OS=Sus scrofa GN=HYI PE=3 SV=1;>tr|I3L9Y6|I3L9Y6_PIG Uncharacterized protein OS=Sus scrofa GN=HYI PE=4 SV=1				0.209504	0.343828	4.41452
>tr|F1S0K2|F1S0K2_PIG Uncharacterized protein OS=Sus scrofa GN=KRT15 PE=3 SV=1				0.210641	0.344047	3.83875
>tr|I3LU27|I3LU27_PIG Uncharacterized protein (Fragment) OS=Sus scrofa GN=ECM2 PE=4 SV=1				0.211025	0.343041	2.03393
>tr|G9F6X9|G9F6X9_PIG Dihydropyrimidinase-like 2 OS=Sus scrofa PE=2 SV=1;>tr|I3LJE2|I3LJE2_PIG Uncharacterized protein OS=Sus scrofa GN=DPYSL2 PE=4 SV=1				0.211216	0.341732	8.66665
>tr|F1SGM3|F1SGM3_PIG Proteasome activator complex subunit 2 OS=Sus scrofa GN=PSME2 PE=4 SV=2				0.213021	0.343034	7.08182
>tr|F1S9C9|F1S9C9_PIG Proteasome subunit beta type OS=Sus scrofa GN=LOC100155139 PE=3 SV=1				0.213934	0.342894	2.74974
>tr|A5A8V6|A5A8V6_PIG Heat shock 70kDa protein 1A OS=Sus scrofa GN=HSPA1A PE=3 SV=1;>tr|I3L7U0|I3L7U0_PIG Uncharacterized protein (Fragment) OS=Sus scrofa GN=HSP70.2 PE=3 SV=1				0.216026	0.344637	4.89486
>tr|F1RQQ7|F1RQQ7_PIG Phosphorylase (Fragment) OS=Sus scrofa GN=PYGB PE=3 SV=2				0.216868	0.344378	3.06525
>tr|F1S8Y5|F1S8Y5_PIG Uncharacterized protein OS=Sus scrofa GN=PGAM1 PE=3 SV=2				0.220341	0.348281	1.86779
>tr|F1RIF8|F1RIF8_PIG 6-phosphogluconate dehydrogenase, decarboxylating (Fragment) OS=Sus scrofa GN=PGD PE=3 SV=2				0.222084	0.349426	2.6318
>tr|I3LK59|I3LK59_PIG Enolase OS=Sus scrofa GN=ENO1 PE=3 SV=1				0.224266	0.351248	4.55309
>tr|A0PFK5|A0PFK5_PIG Capping protein (Actin filament) muscle Z-line, alpha 1 OS=Sus scrofa GN=CP alpha1 PE=2 SV=1;>tr|F6Q4Y6|F6Q4Y6_PIG Uncharacterized protein (Fragment) OS=Sus scrofa GN=CAPZA1 PE=4 SV=1				0.22498	0.350764	3.93883
>tr|F1RFY2|F1RFY2_PIG Beta-enolase OS=Sus scrofa GN=ENO3 PE=3 SV=1;>tr|B1A3A0|B1A3A0_PIG Beta-enolase 3 transcript variant 1 OS=Sus scrofa GN=ENO3 PE=2 SV=1				0.226227	0.351112	3.92867
>tr|F1S232|F1S232_PIG 4-trimethylaminobutyraldehyde dehydrogenase OS=Sus scrofa GN=ALDH9A1 PE=3 SV=2				0.227927	0.352158	7.62148
>tr|F1RNU9|F1RNU9_PIG Glucose-6-phosphate isomerase OS=Sus scrofa GN=GPI PE=3 SV=2				0.230938	0.35521	2.68787
>tr|F1SX62|F1SX62_PIG Uncharacterized protein OS=Sus scrofa GN=VCAN PE=2 SV=1;>tr|K7GPN9|K7GPN9_PIG Uncharacterized protein OS=Sus scrofa GN=VCAN PE=4 SV=1;>tr|I3LLQ0|I3LLQ0_PIG Uncharacterized protein OS=Sus scrofa GN=VCAN PE=4 SV=1;>tr|F1SX61|F1SX61_PIG				0.240191	0.367792	2.2201
>tr|K9IVP5|K9IVP5_PIG N-myosin-9 OS=Sus scrofa GN=MYH9 PE=2 SV=1;>tr|F1SKJ1|F1SKJ1_PIG Uncharacterized protein OS=Sus scrofa GN=MYH9 PE=4 SV=2				0.24222	0.369251	36.3857
>tr|I7HD36|I7HD36_PIG Sodium/potassium-transporting ATPase subunit alpha-1 (Fragment) OS=Sus scrofa GN=atp1a1 PE=2 SV=1;>tr|F1SAX3|F1SAX3_PIG Sodium/potassium-transporting ATPase subunit alpha-1 (Fragment) OS=Sus scrofa GN=ATP1A1 PE=3 SV=2;>tr|D2WKD6|D2WKD				0.245716	0.372923	1.97193
>tr|F1SRK1|F1SRK1_PIG Uncharacterized protein (Fragment) OS=Sus scrofa GN=STAB2 PE=4 SV=2				0.248773	0.375899	1.5422
>tr|K7GRY0|K7GRY0_PIG Uncharacterized protein OS=Sus scrofa GN=UBA1 PE=3 SV=1				0.249094	0.374734	4.43521
>tr|I3L6U3|I3L6U3_PIG Uncharacterized protein OS=Sus scrofa GN=LOC100625068 PE=4 SV=1;>tr|I3L728|I3L728_PIG Uncharacterized protein OS=Sus scrofa GN=LOC100739851 PE=4 SV=1				0.251177	0.376217	1.64889
>tr|Q0QEM6|Q0QEM6_PIG ATP synthase subunit beta (Fragment) OS=Sus scrofa GN=ATP5B PE=2 SV=1;>tr|F1SLA0|F1SLA0_PIG ATP synthase subunit beta OS=Sus scrofa GN=ATP5B PE=2 SV=1;>tr|K7GLT8|K7GLT8_PIG ATP synthase subunit beta OS=Sus scrofa GN=ATP5B PE=2 SV=1				0.252071	0.375915	3.72889
>tr|I3LVJ7|I3LVJ7_PIG Uncharacterized protein (Fragment) OS=Sus scrofa GN=PSMA7 PE=4 SV=1				0.253151	0.37589	3.36245
>tr|I3LBB2|I3LBB2_PIG Vacuolar protein sorting-associated protein 35 (Fragment) OS=Sus scrofa GN=VPS35 PE=3 SV=1				0.259962	0.384341	16.0078
>tr|F1RST0|F1RST0_PIG Uncharacterized protein OS=Sus scrofa GN=HSPH1 PE=3 SV=1;>tr|A4UTN7|A4UTN7_PIG Heat shock 105kDa/110kDa protein 1 OS=Sus scrofa GN=Hsph1 PE=2 SV=1				0.26049	0.383467	8.13369
>tr|A7E1S9|A7E1S9_PIG Putative uncharacterized protein (Fragment) OS=Sus scrofa PE=2 SV=1				0.268175	0.393094	6.90876
>tr|I3LDY2|I3LDY2_PIG Uncharacterized protein OS=Sus scrofa GN=LOC100739304 PE=4 SV=1				0.268535	0.391947	1.63494
>tr|F1SMV6|F1SMV6_PIG Uncharacterized protein (Fragment) OS=Sus scrofa GN=LOC100737174 PE=4 SV=1;>tr|I3LRH2|I3LRH2_PIG Uncharacterized protein OS=Sus scrofa GN=LOC100519984 PE=4 SV=1				0.268776	0.390636	4.83046
>tr|B2CZR7|B2CZR7_PIG CFL2b variant 1 OS=Sus scrofa GN=CFL2b PE=2 SV=1				0.268809	0.389036	3.64667
>tr|F1RGI2|F1RGI2_PIG Uncharacterized protein OS=Sus scrofa GN=LOC100514845 PE=4 SV=2				0.270057	0.3892	2.96609
>tr|F1RIE2|F1RIE2_PIG Uncharacterized protein OS=Sus scrofa GN=DDB1 PE=4 SV=1				0.270986	0.388905	3.77592
>tr|I3LAA4|I3LAA4_PIG Uncharacterized protein OS=Sus scrofa PE=4 SV=1				0.272333	0.389209	1.97508
>tr|I3LS04|I3LS04_PIG Uncharacterized protein (Fragment) OS=Sus scrofa PE=4 SV=1				0.282589	0.402191	30.4873
>tr|F1S073|F1S073_PIG Annexin OS=Sus scrofa GN=ANXA2 PE=3 SV=2				0.28466	0.403464	7.24342
>tr|F2Z571|F2Z571_PIG Uncharacterized protein OS=Sus scrofa GN=TUBB4B PE=2 SV=1;>tr|F2Z5K5|F2Z5K5_PIG Uncharacterized protein OS=Sus scrofa GN=TUBB4A PE=3 SV=1				0.286086	0.403817	4.47253
>tr|F1SNK3|F1SNK3_PIG Uncharacterized protein (Fragment) OS=Sus scrofa GN=LOC100516774 PE=3 SV=2				0.288506	0.405563	0.644966
>tr|F1S1A9|F1S1A9_PIG Uncharacterized protein OS=Sus scrofa GN=APOA2 PE=4 SV=1				0.291466	0.408052	1.55043
>tr|F1RMX5|F1RMX5_PIG Uncharacterized protein OS=Sus scrofa GN=EPHB4 PE=4 SV=1				0.293617	0.409392	0.665761
>tr|K9IVH4|K9IVH4_PIG Carboxypeptidase M OS=Sus scrofa GN=CPM PE=2 SV=1				0.29378	0.407961	0.603464
>tr|Q5IZV0|Q5IZV0_PIG Heat shock protein 27kDa (Fragment) OS=Sus scrofa PE=2 SV=1				0.295632	0.408878	5.8224
>tr|M3TYI1|M3TYI1_PIG Phosphoglucomutase 2 OS=Sus scrofa GN=PGM2 PE=2 SV=1;>tr|M3VH61|M3VH61_PIG Phosphoglucomutase 2 OS=Sus scrofa GN=PGM2 PE=2 SV=1;>tr|F1S4K7|F1S4K7_PIG Uncharacterized protein (Fragment) OS=Sus scrofa GN=PGM2 PE=4 SV=1;>tr|I3L759|I3L759				0.296922	0.409013	6.66626
>tr|Q71M46|Q71M46_PIG Proteasome activator PA28 alpha subunit (Fragment) OS=Sus scrofa GN=PSME1 PE=2 SV=1;>tr|F1SGM1|F1SGM1_PIG Proteasome activator complex subunit 1 OS=Sus scrofa GN=PSME1 PE=4 SV=1;>tr|Q5JC42|Q5JC42_PIG Proteasome activator 28 alpha subu				0.301694	0.413924	3.86732
>tr|F2Z5K2|F2Z5K2_PIG Proteasome subunit alpha type OS=Sus scrofa GN=PSMA5 PE=3 SV=1				0.307587	0.420327	4.95825
>tr|I3LHD5|I3LHD5_PIG Uncharacterized protein OS=Sus scrofa GN=LOC100621648 PE=4 SV=1				0.307911	0.419101	0.615071
>tr|I3LFE0|I3LFE0_PIG Uncharacterized protein OS=Sus scrofa GN=LOC100621801 PE=3 SV=1				0.307947	0.417493	0.647064
>tr|B3GQZ2|B3GQZ2_PIG Haptoglobin OS=Sus scrofa GN=hp PE=2 SV=1				0.312864	0.42249	1.63488
>tr|F1SKR0|F1SKR0_PIG Aggrecan core protein OS=Sus scrofa GN=ACAN PE=4 SV=2				0.315979	0.425022	800.434
>tr|F1SLC4|F1SLC4_PIG Annexin A4 OS=Sus scrofa GN=ANXA4 PE=4 SV=1;>tr|D0G0C5|D0G0C5_PIG Annexin OS=Sus scrofa GN=ANXA4 PE=2 SV=1				0.320061	0.428832	6.49252
>tr|A8U4R4|A8U4R4_PIG Transketolase OS=Sus scrofa GN=tkt PE=2 SV=1				0.326111	0.435237	4.36792
>tr|F1RUK8|F1RUK8_PIG Rab GDP dissociation inhibitor beta OS=Sus scrofa GN=GDI2 PE=2 SV=1				0.326415	0.433954	1.52274
>tr|A9XFX7|A9XFX7_PIG F-actin capping protein alpha 2 subunit OS=Sus scrofa GN=Capza PE=2 SV=1;>tr|A0PFK6|A0PFK6_PIG F-actin capping protein subunit alpha 2 OS=Sus scrofa GN=CP alpha2 PE=2 SV=1				0.330849	0.438152	9.82953
>tr|Q29568|Q29568_PIG Phosphopyruvate hydratase (Fragment) OS=Sus scrofa PE=2 SV=1				0.331979	0.437957	4.97686
>tr|I3LSV6|I3LSV6_PIG Uncharacterized protein (Fragment) OS=Sus scrofa GN=COL2A1 PE=4 SV=1				0.3347	0.439854	7.54706
>tr|I3L656|I3L656_PIG Uncharacterized protein OS=Sus scrofa GN=LOC100511529 PE=2 SV=1;>tr|F1RUP7|F1RUP7_PIG Uncharacterized protein OS=Sus scrofa GN=LOC100511529 PE=2 SV=1;>tr|I3L852|I3L852_PIG Uncharacterized protein OS=Sus scrofa PE=4 SV=1				0.33501	0.438581	1.69738
>tr|F1SFI5|F1SFI5_PIG Uncharacterized protein OS=Sus scrofa GN=HRG PE=4 SV=2				0.336259	0.438543	1.53837
>tr|F1RHM8|F1RHM8_PIG Uncharacterized protein OS=Sus scrofa GN=RANBP1 PE=4 SV=1				0.336681	0.43743	4.59171
>tr|I3LQG7|I3LQG7_PIG Uncharacterized protein OS=Sus scrofa PE=4 SV=1				0.337065	0.436277	2.65678
>tr|B6A7R3|B6A7R3_PIG Carbonic anhydrase IIIb OS=Sus scrofa PE=2 SV=1				0.345989	0.446144	7.35365
>tr|B0F9U6|B0F9U6_PIG Plasma retinol-binding protein 4 (Fragment) OS=Sus scrofa PE=4 SV=1				0.353142	0.453662	3.26359
>tr|F1STZ4|F1STZ4_PIG Complement C1q subcomponent subunit A OS=Sus scrofa GN=C1QA PE=4 SV=1				0.375134	0.480116	5.83163
>tr|F1RX66|F1RX66_PIG Uncharacterized protein (Fragment) OS=Sus scrofa GN=GSR PE=3 SV=2;>tr|Q6UK62|Q6UK62_PIG Glutathione reductase (Fragment) OS=Sus scrofa GN=GSR PE=2 SV=1				0.390386	0.497778	2.9917
>tr|F1SRK6|F1SRK6_PIG Endoplasmin OS=Sus scrofa GN=HSP90B1 PE=3 SV=2				0.393584	0.499998	1.87777
>tr|C5H0C6|C5H0C6_PIG OTUB1 OS=Sus scrofa GN=OTUB1 PE=2 SV=1				0.395897	0.50108	2.26734
>tr|I3LMU6|I3LMU6_PIG Uncharacterized protein (Fragment) OS=Sus scrofa GN=RCN3 PE=4 SV=1				0.400628	0.505203	1.91996
>tr|F1SAF0|F1SAF0_PIG Dihydrolipoyl dehydrogenase OS=Sus scrofa GN=DLD PE=2 SV=1				0.401395	0.504317	2.42693
>tr|I3LIM8|I3LIM8_PIG Uncharacterized protein (Fragment) OS=Sus scrofa GN=MAN1B1 PE=4 SV=1				0.40236	0.503685	1.5441
>tr|I3LL80|I3LL80_PIG L-lactate dehydrogenase OS=Sus scrofa GN=LOC407246 PE=3 SV=1				0.402514	0.502045	1.55951
>tr|I3LJX2|I3LJX2_PIG Uncharacterized protein OS=Sus scrofa PE=4 SV=1				0.403986	0.502056	4.63068
>tr|F1SHZ9|F1SHZ9_PIG Uncharacterized protein (Fragment) OS=Sus scrofa GN=MDGA2 PE=4 SV=1				0.40489	0.501361	1.67933
>tr|F1SKY2|F1SKY2_PIG Uncharacterized protein OS=Sus scrofa GN=NIT2 PE=4 SV=2				0.416475	0.513852	1.60328
>tr|F2Z5C1|F2Z5C1_PIG Annexin OS=Sus scrofa GN=ANXA5 PE=3 SV=2				0.416538	0.512088	4.13581
>tr|Q53YN7|Q53YN7_PIG Growth hormone OS=Sus scrofa GN=pGH PE=2 SV=1;>tr|Q4TTE2|Q4TTE2_PIG Growth hormone OS=Sus scrofa PE=3 SV=1;>tr|Q4KVL6|Q4KVL6_PIG Growth hormone OS=Sus scrofa GN=pGH PE=2 SV=1;>tr|Q4KVL5|Q4KVL5_PIG Growth hormone OS=Sus scrofa PE=3 SV=				0.420617	0.515255	2.21921
>tr|B1Q039|B1Q039_PIG CRYAB OS=Sus scrofa GN=CRYAB PE=3 SV=1				0.426301	0.52036	2.90849
>tr|F1SJP9|F1SJP9_PIG Uncharacterized protein OS=Sus scrofa GN=NAGA PE=4 SV=1;>tr|B1PK16|B1PK16_PIG N-acetylgalactosaminidase alpha OS=Sus scrofa PE=2 SV=1				0.427077	0.519459	1.89227
>tr|K7GNP8|K7GNP8_PIG Uncharacterized protein OS=Sus scrofa GN=SEMA4D PE=4 SV=1;>tr|K7GSK3|K7GSK3_PIG Uncharacterized protein OS=Sus scrofa GN=SEMA4D PE=4 SV=1;>tr|K7GR88|K7GR88_PIG Uncharacterized protein OS=Sus scrofa GN=SEMA4D PE=4 SV=1;>tr|F1RN15|F1RN1				0.430518	0.521794	1.53583
>tr|F1SNL7|F1SNL7_PIG Uncharacterized protein OS=Sus scrofa GN=LOC100621569 PE=4 SV=1				0.431776	0.521476	5.08051
>tr|F1RS36|F1RS36_PIG 78 kDa glucose-regulated protein OS=Sus scrofa GN=HSPA5 PE=3 SV=2				0.434433	0.522844	1.69958
>tr|Q000H8|Q000H8_PIG Glutathione S-transferase mu 2 (Fragment) OS=Sus scrofa PE=3 SV=1;>tr|Q000H9|Q000H9_PIG Glutathione S-transferase mu 2 OS=Sus scrofa PE=2 SV=1				0.466386	0.559336	2.06367
>tr|F1STR9|F1STR9_PIG Uncharacterized protein OS=Sus scrofa GN=SFN PE=3 SV=1;>tr|Q1W2G0|Q1W2G0_PIG 14-3-3 sigma protein OS=Sus scrofa GN=Sfn PE=2 SV=1				0.468661	0.560107	3.44377
>tr|I3LV69|I3LV69_PIG Pyridoxal kinase (Fragment) OS=Sus scrofa GN=PDXK PE=4 SV=1				0.47285	0.563151	3.69051
>tr|D6BV38|D6BV38_PIG L-gulonate 3-dehydrogenase OS=Sus scrofa GN=GulDH PE=2 SV=1;>tr|F1RVB1|F1RVB1_PIG Lambda-crystallin homolog (Fragment) OS=Sus scrofa GN=CRY PE=4 SV=1				0.476244	0.565231	4.8941
>tr|I3L6M8|I3L6M8_PIG Ribonuclease inhibitor (Fragment) OS=Sus scrofa GN=RNH1 PE=4 SV=1				0.478401	0.565833	2.39997
>tr|F1RTN3|F1RTN3_PIG Moesin OS=Sus scrofa GN=MSN PE=4 SV=1				0.479497	0.56518	2.33779
>tr|F1SC80|F1SC80_PIG Retinol-binding protein 4 OS=Sus scrofa GN=RBP4 PE=3 SV=1				0.488917	0.57431	1.57109
>tr|A0SNU7|A0SNU7_PIG Glyceraldehyde-3-phosphate dehydrogenase (Fragment) OS=Sus scrofa PE=2 SV=1;>tr|F1SLR8|F1SLR8_PIG Glyceraldehyde-3-phosphate dehydrogenase (Fragment) OS=Sus scrofa GN=GAPDH PE=3 SV=1				0.490356	0.574035	1.9396
>tr|K9J4N3|K9J4N3_PIG Branched-chain-amino-acid aminotransferase OS=Sus scrofa GN=BCAT1 PE=2 SV=1;>tr|I3LKW2|I3LKW2_PIG Branched-chain-amino-acid aminotransferase OS=Sus scrofa GN=BCAT1 PE=3 SV=1				0.496238	0.578945	1.74247
>tr|Q7YRP6|Q7YRP6_PIG Low molecular weight kininogen (Fragment) OS=Sus scrofa GN=kng PE=2 SV=1				0.500362	0.581776	1.56165
>tr|Q3HWE5|Q3HWE5_PIG Vimentin (Fragment) OS=Sus scrofa domesticus PE=2 SV=1				0.501119	0.580689	28.6261
>tr|G9F6X8|G9F6X8_PIG Prolyl 4-hydroxylase beta polypeptide OS=Sus scrofa PE=2 SV=1				0.502633	0.580482	2.43697
>tr|F1SC98|F1SC98_PIG Uncharacterized protein (Fragment) OS=Sus scrofa GN=IDE PE=3 SV=2				0.506891	0.583435	2.83899
>tr|F1SU52|F1SU52_PIG Uncharacterized protein OS=Sus scrofa GN=LOC100522130 PE=4 SV=2				0.508596	0.583439	1.6852
>tr|F1RX37|F1RX37_PIG Fibrinogen beta chain OS=Sus scrofa GN=FGB PE=4 SV=2;>tr|I3L651|I3L651_PIG Uncharacterized protein OS=Sus scrofa PE=4 SV=1				0.531468	0.607645	2.58292
>tr|F1SPG0|F1SPG0_PIG Uncharacterized protein (Fragment) OS=Sus scrofa GN=RAB7A PE=4 SV=2				0.559017	0.63702	1.69565
>tr|F1S8G5|F1S8G5_PIG Thimet oligopeptidase OS=Sus scrofa GN=THOP1 PE=3 SV=2				0.567276	0.64429	1.91554
>tr|I3L7V6|I3L7V6_PIG Uncharacterized protein OS=Sus scrofa GN=PODXL2 PE=4 SV=1				0.568641	0.643709	6.16649
>tr|F2Z5L7|F2Z5L7_PIG Proteasome subunit alpha type OS=Sus scrofa GN=LOC100516779 PE=3 SV=1				0.569962	0.643082	1.6014
>tr|F1S4M3|F1S4M3_PIG Uncharacterized protein OS=Sus scrofa GN=PCDH7 PE=4 SV=2				0.574571	0.646157	7.41229
>tr|F1SUA0|F1SUA0_PIG Uncharacterized protein (Fragment) OS=Sus scrofa GN=FBLN7 PE=4 SV=2				0.577545	0.647379	4.22767
>tr|L8B0W4|L8B0W4_PIG IgG heavy chain OS=Sus scrofa GN=IGHG PE=2 SV=1				0.578522	0.646361	1.50194
>tr|F1SEF7|F1SEF7_PIG Serine/threonine-protein phosphatase (Fragment) OS=Sus scrofa GN=PPP1CB PE=3 SV=1;>tr|Q2EHH7|Q2EHH7_PIG Serine/threonine-protein phosphatase OS=Sus scrofa PE=2 SV=1;>tr|Q2EHH8|Q2EHH8_PIG Serine/threonine-protein phosphatase OS=Sus scr				0.595247	0.662889	1.85295
>tr|F1SJ30|F1SJ30_PIG Mannose-6-phosphate isomerase OS=Sus scrofa GN=MPI PE=3 SV=1				0.599155	0.665082	3.28682
>tr|B3STX9|B3STX9_PIG Prothrombin OS=Sus scrofa PE=2 SV=1				0.600521	0.664447	2.01993
>tr|Q53DY7|Q53DY7_PIG Histone H1.3-like protein (Fragment) OS=Sus scrofa PE=2 SV=1;>tr|Q4TTS4|Q4TTS4_PIG Histone H1.2-like protein OS=Sus scrofa PE=3 SV=1				0.600612	0.662411	6.70659
>tr|F1RH79|F1RH79_PIG Uncharacterized protein OS=Sus scrofa GN=BRD8 PE=4 SV=2				0.601997	0.66181	1.5426
>tr|K9IVT0|K9IVT0_PIG Neuropilin-2 OS=Sus scrofa GN=NRP2 PE=2 SV=1;>tr|I3LB28|I3LB28_PIG Uncharacterized protein OS=Sus scrofa PE=4 SV=1				0.605249	0.66326	1.65004
>tr|F1RK12|F1RK12_PIG Integral membrane protein 2B OS=Sus scrofa GN=ITM2B PE=2 SV=2;>tr|Q2V6H9|Q2V6H9_PIG Integral membrane protein 2B (Fragment) OS=Sus scrofa GN=ITM2B PE=2 SV=1				0.617728	0.674779	1.70157
>tr|I3LPB5|I3LPB5_PIG Creatine kinase B-type (Fragment) OS=Sus scrofa GN=CKB PE=3 SV=1				0.622435	0.677762	2.63689
>tr|Q28936|Q28936_PIG Fibrinogen A-alpha-chain (Fragment) OS=Sus scrofa PE=4 SV=1				0.626345	0.679861	2.31826
>tr|F1SL03|F1SL03_PIG Uncharacterized protein (Fragment) OS=Sus scrofa GN=LOC100624376 PE=4 SV=2				0.630988	0.682741	2.76179
>tr|F1RFY1|F1RFY1_PIG Profilin OS=Sus scrofa GN=PFN1 PE=3 SV=1				0.643731	0.694339	2.44411
>tr|K9IVP8|K9IVP8_PIG Obg-like ATPase 1 OS=Sus scrofa GN=OLA1 PE=2 SV=1;>tr|F1S062|F1S062_PIG Uncharacterized protein OS=Sus scrofa GN=OLA1 PE=2 SV=2				0.649977	0.698878	12.7871
>tr|W6D796|W6D796_PIG Beta-Ala-His dipeptidase OS=Sus scrofa GN=CNDP1 PE=2 SV=1;>tr|F1SNL8|F1SNL8_PIG Uncharacterized protein OS=Sus scrofa GN=CNDP1 PE=4 SV=2				0.657295	0.704538	2.09349
>tr|L8B0U3|L8B0U3_PIG IgG heavy chain OS=Sus scrofa GN=IGHG PE=2 SV=1;>tr|L8AXM9|L8AXM9_PIG IgG heavy chain OS=Sus scrofa GN=IGHG PE=2 SV=1;>tr|L8B139|L8B139_PIG IgG heavy chain OS=Sus scrofa GN=IGHG PE=2 SV=1				0.666198	0.711856	1.77435
>tr|K7GP55|K7GP55_PIG Biglycan OS=Sus scrofa GN=BGN PE=2 SV=1;>tr|F1S2B6|F1S2B6_PIG Biglycan (Fragment) OS=Sus scrofa GN=BGN PE=2 SV=1;>tr|K7GNH7|K7GNH7_PIG Biglycan OS=Sus scrofa GN=BGN PE=2 SV=1				0.677025	0.721179	29.9896
>tr|F1SAD9|F1SAD9_PIG Uncharacterized protein OS=Sus scrofa GN=PDIA4 PE=3 SV=1				0.716515	0.760882	2.69278
>tr|I3LII3|I3LII3_PIG Uncharacterized protein OS=Sus scrofa GN=EEF2 PE=4 SV=1				0.723728	0.766169	2.91605
>tr|F1RQB2|F1RQB2_PIG Uncharacterized protein OS=Sus scrofa GN=FAT2 PE=4 SV=2				0.730854	0.771332	2.17503
>tr|F1RS31|F1RS31_PIG Uncharacterized protein (Fragment) OS=Sus scrofa GN=FREM2 PE=4 SV=2				0.733599	0.771854	1.72119
>tr|F1S4X9|F1S4X9_PIG Uncharacterized protein OS=Sus scrofa GN=GSS PE=4 SV=2				0.76518	0.80262	1.84878
>tr|F1RZR6|F1RZR6_PIG Uncharacterized protein OS=Sus scrofa GN=CUTA PE=4 SV=1				0.769147	0.804322	2.1335
>tr|I3LV76|I3LV76_PIG Uncharacterized protein OS=Sus scrofa PE=4 SV=1				0.780128	0.813325	2.04356
>tr|Q69DL4|Q69DL4_PIG Complement C1qB (Fragment) OS=Sus scrofa PE=2 SV=1;>tr|F1STZ1|F1STZ1_PIG Uncharacterized protein OS=Sus scrofa GN=C1QB PE=4 SV=1				0.788376	0.819433	2.00083
>tr|F1RGK2|F1RGK2_PIG Uncharacterized protein OS=Sus scrofa GN=MEGF8 PE=4 SV=2				0.8145	0.844029	1.67033
>tr|Q29569|Q29569_PIG Histone H3 (Fragment) OS=Sus scrofa PE=2 SV=1;>tr|K9IWF3|K9IWF3_PIG Histone H3 OS=Sus scrofa GN=H3F3B PE=2 SV=1;>tr|F2Z5K9|F2Z5K9_PIG Histone H3 OS=Sus scrofa GN=HIST2H3A PE=3 SV=1;>tr|F2Z576|F2Z576_PIG Histone H3 OS=Sus scrofa GN=LOC				0.821558	0.848778	3.21663
>tr|I3LGK3|I3LGK3_PIG Ribonuclease pancreatic (Fragment) OS=Sus scrofa GN=RNASE1 PE=3 SV=1;>tr|D0PSF7|D0PSF7_PIG Ribonuclease OS=Sus scrofa GN=RNASE1 PE=2 SV=1;>tr|Q9TVC0|Q9TVC0_PIG Pancreatic ribonuclease (Fragment) OS=Sus scrofa PE=3 SV=1				0.854277	0.879931	2.45801
>tr|F1RFU5|F1RFU5_PIG Aspartate aminotransferase (Fragment) OS=Sus scrofa GN=GOT2 PE=3 SV=2				0.861871	0.885095	1.79379
>tr|Q6JVS2|Q6JVS2_PIG Complement factor D (Fragment) OS=Sus scrofa GN=DF PE=3 SV=1				0.890305	0.911566	3.87201
>tr|D3KVS6|D3KVS6_PIG 16kDa secretory protein OS=Sus scrofa domesticus GN=NPC2 PE=4 SV=1				0.897625	0.916326	2.34498
>tr|F1SQ60|F1SQ60_PIG Uncharacterized protein (Fragment) OS=Sus scrofa GN=HEG1 PE=4 SV=2;>tr|I3LM17|I3LM17_PIG Uncharacterized protein OS=Sus scrofa GN=HEG1 PE=4 SV=1				0.92265	0.939077	1.5224
>tr|F1SEN1|F1SEN1_PIG Annexin OS=Sus scrofa GN=ANXA8 PE=2 SV=1				0.965154	0.979431	29.4335
>tr|F1RN55|F1RN55_PIG Uncharacterized protein OS=Sus scrofa GN=EFNA5 PE=3 SV=2				0.967022	0.978432	1.51695
>tr|F1SGG2|F1SGG2_PIG Uncharacterized protein OS=Sus scrofa GN=KRT8 PE=3 SV=1				0.969449	0.978003	5.19834
>tr|F2Z5F2|F2Z5F2_PIG Uncharacterized protein OS=Sus scrofa GN=RAB10 PE=3 SV=1;>tr|F2Z4Z0|F2Z4Z0_PIG Uncharacterized protein OS=Sus scrofa GN=RAB35 PE=3 SV=1;>tr|F2Z5I8|F2Z5I8_PIG Uncharacterized protein OS=Sus scrofa GN=RAB8A PE=3 SV=1				0.970203	0.975893	2.36439
>tr|I3LA35|I3LA35_PIG Uncharacterized protein OS=Sus scrofa GN=LOC100737042 PE=4 SV=1				0.976034	0.978888	2.32061
>tr|Q68RU1|Q68RU1_PIG Ovarian and testicular apolipoprotein N OS=Sus scrofa GN=ApoN PE=2 SV=1				0.995255	0.995255	14.0394
